# Supplementary material for: Evolution of East Asia’s Arcto-Tertiary relict Euptelea (Eupteleaceae) shaped by Late Neogene vicariance and Quaternary climate change
Source: PubMed Central journal article supplement (PMC4802896; doi:10.1186/s12862-016-0636-x), 2016-03-22

BIO1

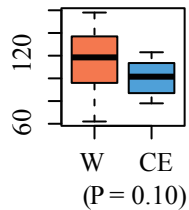

BIO2

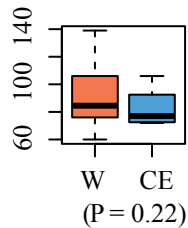

BIO3

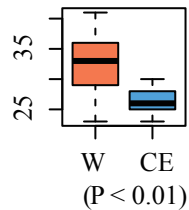

BIO4

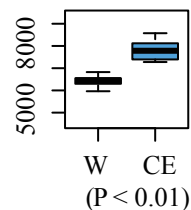

BIO5

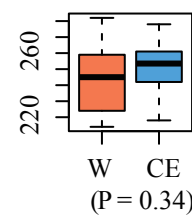

BIO6

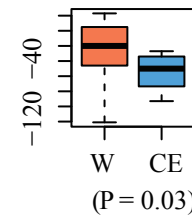

BIO7

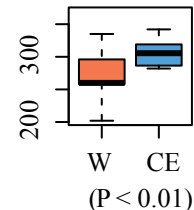

BIO8

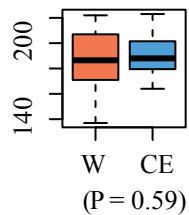

BIO9

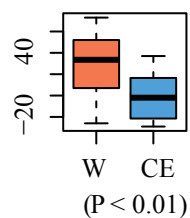

BIO10

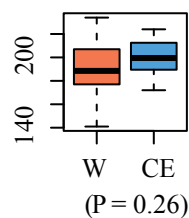

BIO11

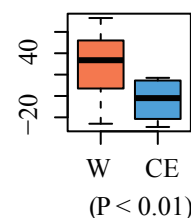

BIO12

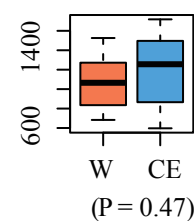

BIO13

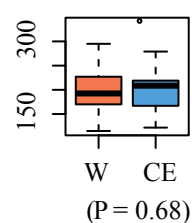

BIO14

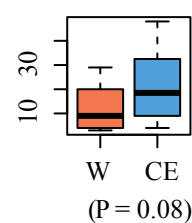

BIO15

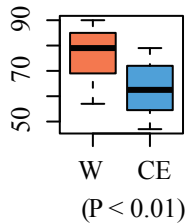

BIO16

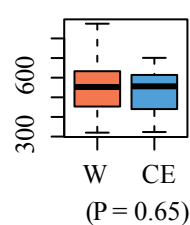

BIO17

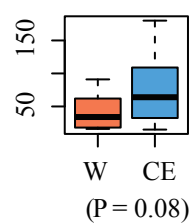

BIO18

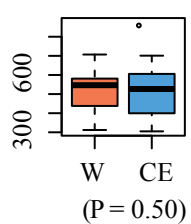

BIO19

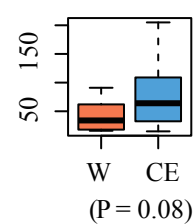

Supplement: 12862_2016_636_MOESM10_ESM.pdf [file 12862_2016_636_MOESM10_ESM.pdf]
