# Supplementary material for: Evolution of East Asia’s Arcto-Tertiary relict Euptelea (Eupteleaceae) shaped by Late Neogene vicariance and Quaternary climate change
Source: PubMed Central journal article supplement (PMC4802896; doi:10.1186/s12862-016-0636-x), 2016-03-22

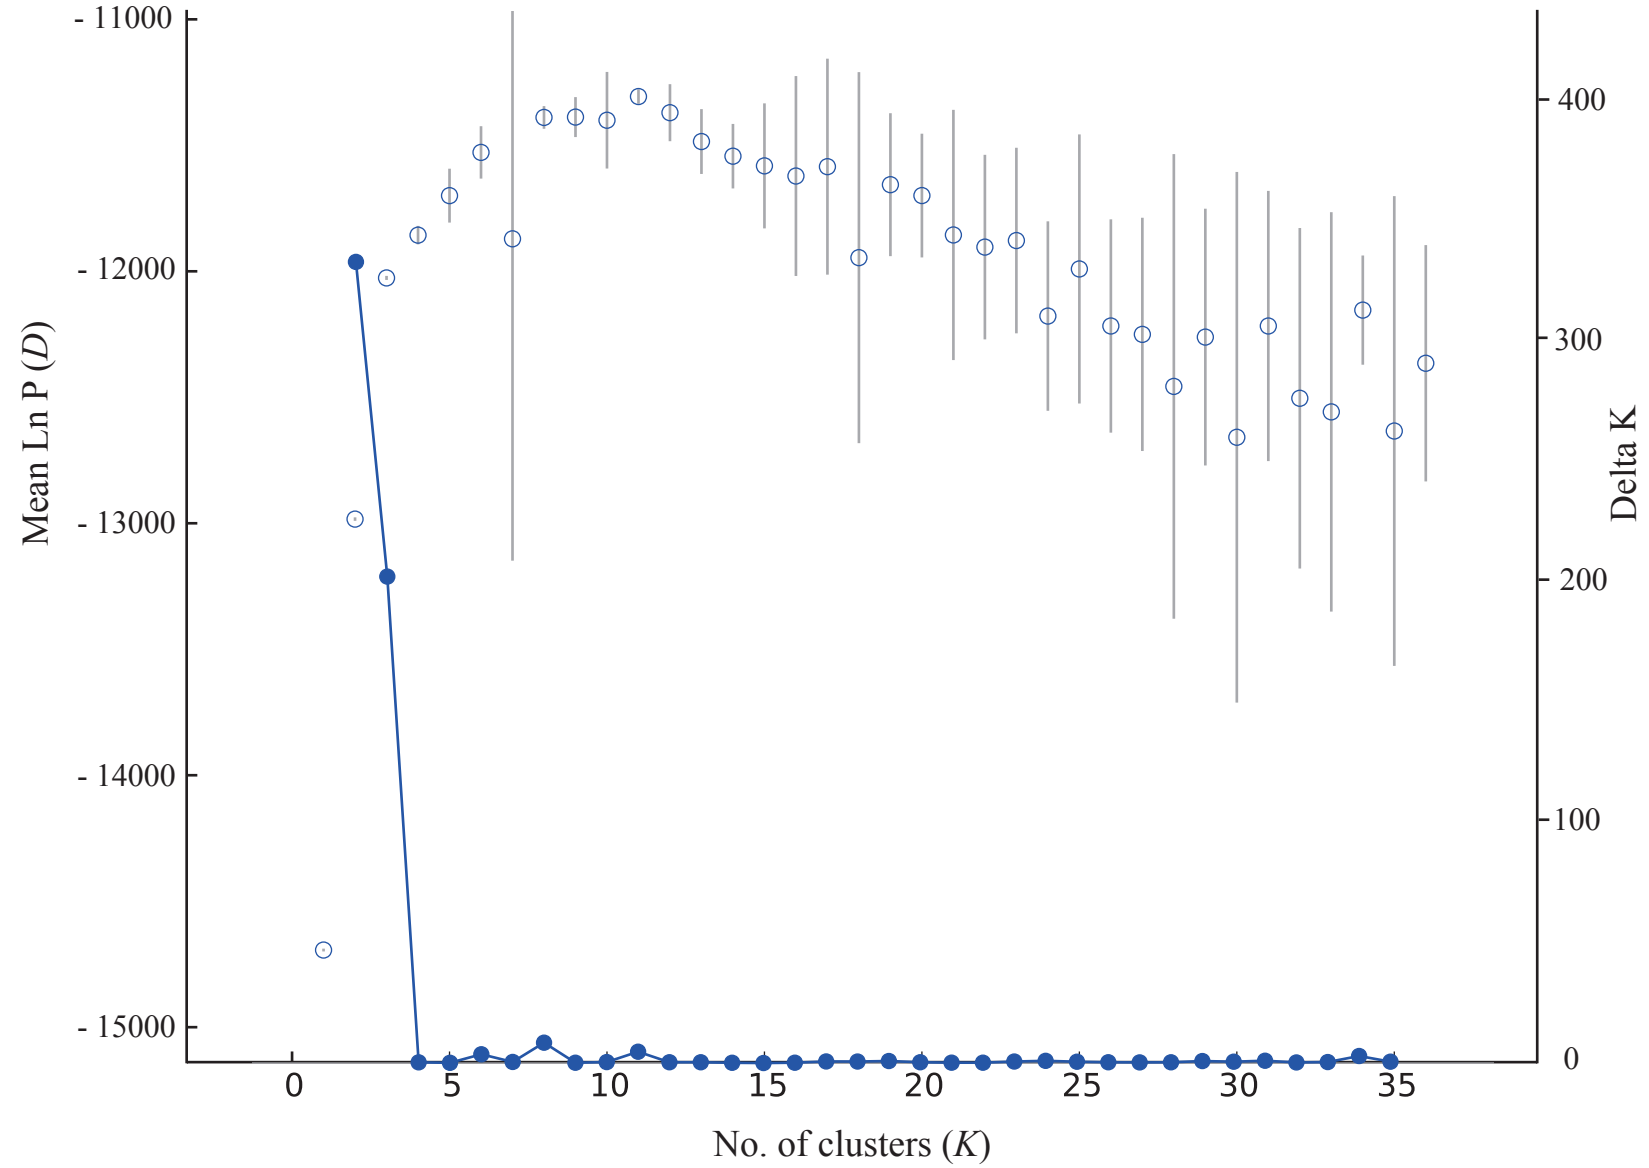

Supplement: 12862_2016_636_MOESM7_ESM.pdf [file 12862_2016_636_MOESM7_ESM.pdf]
