# Supplementary material for: Evolution of East Asia’s Arcto-Tertiary relict Euptelea (Eupteleaceae) shaped by Late Neogene vicariance and Quaternary climate change
Source: PubMed Central journal article supplement (PMC4802896; doi:10.1186/s12862-016-0636-x), 2016-03-22
Supplement: 12862_2016_636_MOESM9_ESM.pdf [file 12862_2016_636_MOESM9_ESM.pdf]

BIO1

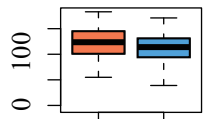

China Japan  
( $P < 0.01$ )

BIO2

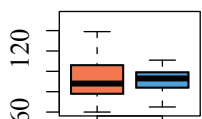

China Japan  
( $P = 0.56$ )

BIO3

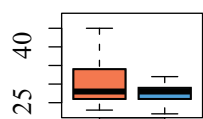

China Japan  
( $P < 0.01$ )

BIO4

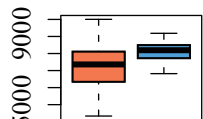

China Japan  
( $P < 0.01$ )

BIO5

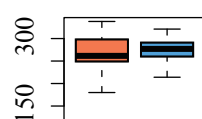

China Japan  
( $P = 0.02$ )

BIO6

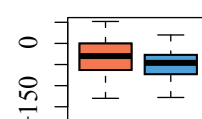

China Japan  
( $P < 0.01$ )

BIO7

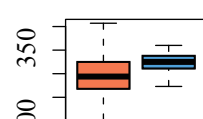

China Japan  
( $P < 0.01$ )

BIO8

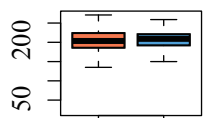

China Japan  
( $P = 0.62$ )

BIO9

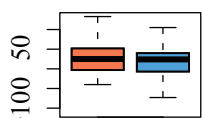

China Japan  
( $P = 0.01$ )

BIO10

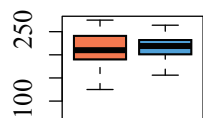

China Japan  
( $P = 0.39$ )

BIO11

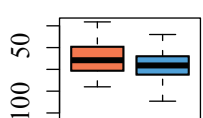

China Japan  
( $P < 0.01$ )

BIO12

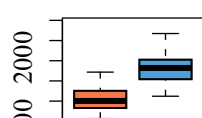

China Japan  
( $P < 0.01$ )

BIO13

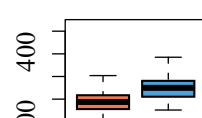

China Japan  
( $P < 0.01$ )

BIO14

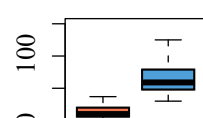

China Japan  
( $P < 0.01$ )

BIO15

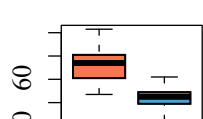

China Japan  
( $P < 0.01$ )

BIO16

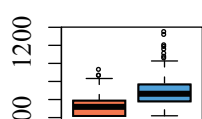

China Japan  
( $P < 0.01$ )

BIO17

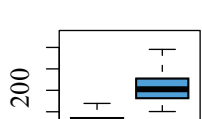

China Japan  
( $P < 0.01$ )

BIO18

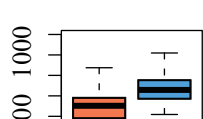

China Japan  
( $P < 0.01$ )

BIO19

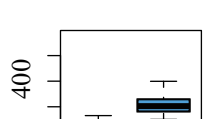

China Japan  
( $P < 0.01$ )
